# Supplementary material for: Global Mapping of Traditional Chinese Medicine into Bioactivity Space and Pathways Annotation Improves Mechanistic Understanding and Discovers Relationships between Therapeutic Action (Sub)classes
Source: Evid Based Complement Alternat Med. 2016 Feb 18;2016:2106465. doi: 10.1155/2016/2106465 (PMC4775820; doi:10.1155/2016/2106465)
Supplement: Supplementary file 1 — Supplementary Material contains tables of top three enriched targets and pathways in all 14 clusters, in which each enriched target is annotated with its function reported in literature while each enriched pathway is annotated with pathway motif according to KEGG. [file 2106465.f1.xlsx]

## Sheet: 1
Top three enriched targets across 14 clusters
Cluster	TCM Therapeutic Action class	TCM Therapeutic Action subclass	Top three enriched targets	Target function reported by literatures
I	Purgative medicinal	Offensive purgative	Protein kinase C beta type	immunomodulation
			Protein kinase C delta type	immunomodulation
			Sodium/glucose cotransporter 2	glucose homeostasis
II	Purgative medicinal	Laxative medicinal	DNA topoisomerase 1	cancer
			Oxysterols receptor LXR-alpha	lipid homeostasis
			Tyrosine-protein phosphatase non-receptor type 2	immunomodulation
	Hemostatic medicinal	Astringent hemostatic	DNA topoisomerase 1	cancer
			Telomerase reverse transcriptase	cancer
			Sodium/glucose cotransporter 1	glucose homeostasis
	Liver-pacifying and wind extinguishing	Liver yang calming	Telomerase reverse transcriptase	cancer
			DNA topoisomerase 1	cancer
			Wee1-like protein kinase	cancer
III	Anti-malarial medicinal	Anti-malarial medicinal	Oxysterols receptor LXR-alpha	lipid homeostasis
			Tyrosine-protein phosphatase non-receptor type 2	immunomodulation
			DNA topoisomerase 1	cancer
	Astringent	Secure essence, reduce urination, and check vaginal discharge	Oxysterols receptor LXR-alpha	lipid homeostasis
			Tyrosine-protein phosphatase non-receptor type 2	immunomodulation
			DNA topoisomerase 1	cancer
	Dampness resolving	Water draining and anti-icteric	DNA topoisomerase 1	cancer
			Sodium/glucose cotransporter 2	glucose homeostasis
			Sodium/glucose cotransporter 1	glucose homeostasis
	Tonifying and replenishing	Yang tonifying	Sodium/glucose cotransporter 2	glucose homeostasis
			DNA topoisomerase 1	cancer
			Sodium/glucose cotransporter 1	glucose homeostasis
	Heat clearing medicinal	Heat clearing and detoxicating	DNA topoisomerase 1	cancer
			Sodium/glucose cotransporter 2	glucose homeostasis
			Sodium/glucose cotransporter 1	glucose homeostasis
	Tonifying and replenishing	Yin tonifying	Sodium/glucose cotransporter 2	glucose homeostasis
			DNA topoisomerase 1	cancer
			Oxysterols receptor LXR-alpha	lipid homeostasis
	Exterior releasing	Wind heat dispersing	Tyrosine-protein phosphatase non-receptor type 2	immunomodulation
			DNA topoisomerase 1	cancer
			Sodium/glucose cotransporter 2	glucose homeostasis
	Wind-dampness dispelling	Heat clearing	Tyrosine-protein phosphatase non-receptor type 2	immunomodulation
			DNA topoisomerase 1	cancer
			Sodium/glucose cotransporter 1	glucose homeostasis
	Heat clearing medicinal	Heat clearing and fire purging	Tyrosine-protein phosphatase non-receptor type 2	immunomodulation
			Oxysterols receptor LXR-alpha	lipid homeostasis
			DNA topoisomerase 1	cancer
	Dampness resolving	Water draining and strangury resolving	Tyrosine-protein phosphatase non-receptor type 2	immunomodulation
			DNA topoisomerase 1	cancer
			Oxysterols receptor LXR-alpha	lipid homeostasis
IV	Heat clearing medicinal	Heat clearing and dampness drying	Sodium/glucose cotransporter 2	glucose homeostasis
			DNA topoisomerase 1	cancer
			Protein kinase C beta type	immunomodulation
	Blood activating and stress resolving	Blood activating trauma curing	Leukotriene B4 receptor 1	lipid homeostasis
			DNA topoisomerase 1	cancer
			Estrogen receptor	cancer
	Liver-pacifying and wind extinguishing	Extinguish wind to resolve convulsion	Oxysterols receptor LXR-alpha	lipid homeostasis
			Leukotriene B4 receptor 1	immunomodulation
			Glutamate carboxypeptidase 2	central nervous system
	Blood activating and stress resolving	Blood activating menstruation resolving	Tyrosine-protein phosphatase non-receptor type 2	immunomodulation
			Oxysterols receptor LXR-alpha	lipid homeostasis
			DNA topoisomerase 1	cancer
	Cough suppressing and panting-calming	Cough suppressing and panting calming	Tyrosine-protein phosphatase non-receptor type 2	immunomodulation
			DNA topoisomerase 1	cancer
			Leukotriene B4 receptor 1	immunomodulation
	Worm expelling medicinal	Worm expelling medicinal	Leukotriene B4 receptor 1	immunomodulation
			Tyrosine-protein phosphatase non-receptor type 2	immunomodulation
			Sodium/glucose cotransporter 2	glucose homeostasis
V	Astringent	Lung-intestine astringent	Protein kinase C beta type	immunomodulation
			Endothelin B receptor	cardio vasodilation
			DNA topoisomerase 1	cancer
	Digestant medicinal	Digestant medicinal	Oxysterols receptor LXR-alpha	lipid homeostasis
			Leukotriene B4 receptor 1	immunomodulation
			DNA topoisomerase 1	cancer
	Cough suppressing and panting-calming	Cold phlegm resolving and warming	DNA topoisomerase 1	cancer
			Tyrosine-protein phosphatase non-receptor type 2	immunomodulation
			Telomerase reverse transcriptase	cancer
VI	Emetic medicinal		Integrin alpha-L	immunomodulation
			Poly [ADP-ribose] polymerase 1	inflammation
			Multidrug resistance-associated protein 1	cytotoxicity
VII	Heat clearing medicinal	Heat clearing and blood cooling	Protein kinase C beta type	immunomodulation
			DNA topoisomerase 1	cancer
			Sodium/glucose cotransporter 2	glucose homeostasis
	Hemostatic medicinal	Stasis-resolving hemostatic	Tyrosine-protein phosphatase non-receptor type 2	immunomodulation
			Protein kinase C eta type	immunomodulation
			Protein kinase C gamma type	immunomodulation
	Tonifying and replenishing	Blood tonifying	Tyrosine-protein phosphatase non-receptor type 2	immunomodulation
			Protein kinase C beta type	immunomodulation
			Protein kinase C eta type	immunomodulation
VIII	Orifice opening	Orifice opening	Steryl-sulfatase	immunomodulation
			Testosterone 17-beta-dehydrogenase 3	reproduction system
			Ileal sodium/bile acid cotransporter	bile
IX	Purgative medicinal	Drastic (purgative) water-expelling	Protein kinase C beta type	immunomodulation
			Protein kinase C delta type	immunomodulation
			Protein kinase C eta type	immunomodulation
	Dampness resolving	Water draining and swelling dispersing	Glutamate carboxypeptidase 2	central nervous system
			Protein kinase C beta type	immunomodulation
			Tyrosine-protein phosphatase non-receptor type 2	immunomodulation
	Wind-dampness dispelling	Cold dispersing	Tyrosine-protein phosphatase non-receptor type 2	immunomodulation
			DNA topoisomerase 1	cancer
			Sodium/glucose cotransporter 1	glucose homeostasis
X	Wind-dampness dispelling	Bone(sinew) strengthening	DNA topoisomerase 1	cancer
			Sodium/glucose cotransporter 1	glucose homeostasis
			Steryl-sulfatase	immunomodulation
	Tonifying and replenishing	Qi tonifying	Tyrosine-protein phosphatase non-receptor type 2	immunomodulation
			Sodium/glucose cotransporter 2	glucose homeostasis
			Sodium/glucose cotransporter 1	glucose homeostasis
	Cough suppressing and panting-calming	Clearing and Heat phlegm resolving	Tyrosine-protein phosphatase non-receptor type 2	immunomodulation
			DNA topoisomerase 1	cancer
			Testosterone 17-beta-dehydrogenase 3	reproductive system
	Tranqulizing	Heat nourishing tranquilizing	Peptidyl-prolyl cis-trans isomerase FKBP1A	immunomodulation
			Tyrosine-protein phosphatase non-receptor type 2	immunomodulation
			Glutamate carboxypeptidase 2	central nervous system
XI	Astringent	Anhidrotic	Beta-1 adrenergic receptor	cardiac contraction
			5-hydroxytryptamine receptor 2A	central nervous system
			Glutamate [NMDA] receptor subunit epsilon-2	central nervous system
XII	Parasite destroying, dampness eliminating and itchiness relieving		Dihydrofolate reductase	cancer, bacterial infection
			DNA-dependent protein kinase catalytic subunit	cancer
			Tumor necrosis factor	cancer, bacterial infection
XII	Hemostatic medicinal	Meridian warming hemostatic	Peptidyl-prolyl cis-trans isomerase FKBP1A	immunomodulation
			Multidrug resistance protein 1	cytotoxicity
			Steryl-sulfatase	immunomodulation
	Exterior releasing	Wind cold dispersing	Steryl-sulfatase	immunomodulation
			Endothelin B receptor	cardio vasodilation
			cAMP-specific 3',5'-cyclic phosphodiesterase 4B	immunomodulation
	Interior warming	Interior warming	Protein kinase C delta type	immunomodulation
			Multidrug resistance protein 1	cytotoxicity
			Steroid hormone receptor ERR1	relate to estrogen receptor
XIV	Heat clearing medicinal	Deficiency	Sodium/glucose cotransporter 2	glucose homeostasis
			DNA topoisomerase 1	cancer
			Sodium/glucose cotransporter 1	glucose homeostasis
	Qi regulating	Qi regulating	DNA topoisomerase 1	cancer
			Glutamate receptor, ionotropic kainate 1	central nervous system
			Steryl-sulfatase	immunomodulation
	Blood activating and stress resolving	Blood activating analgesic	Tyrosine-protein phosphatase non-receptor type 2	immunomodulation
			Tyrosine-protein phosphatase non-receptor type 1	immunomodulation
			Prostaglandin E2 receptor EP2 subtype	bone metabolism
	Hemostatic medicinal	Blood cooling hemostatic	Oxysterols receptor LXR-alpha	lipid homeostasis
			Tyrosine-protein phosphatase non-receptor type 2	immunomodulation
			Leukotriene B4 receptor 1	lipid homeostasis
	Blood activating and stress resolving	Blood breaking mass eliminating	Oxysterols receptor LXR-alpha	lipid homeostasis
			Leukotriene B4 receptor 1	immunomodulation
			Tyrosine-protein phosphatase non-receptor type 2	immunomodulation

## Sheet: 2
Top three enriched pathways across 14 clusters
Cluster	TCM Therapeutic Action class	TCM Therapeutic Action subclass	Top three enriched pathways	Pathway motif according to KEGG
I	Purgative medicinal	Offensive purgative	hsa04978 Mineral absorption	Digestive system
			hsa04973 Carbohydrate digestion and absorption	Digestive system
			hsa04530 Tight junction	Cellular commiunity
II	Purgative medicinal	Laxative medicinal	hsa04978 Mineral absorption	Digestive system
			hsa00040 Pentose and glucuronate interconversions	Carbohydrate metabolism
			hsa00561 Glycerolipid metabolism	Lipid metabolism
	Hemostatic medicinal	Astringent hemostatic	hsa04978 Mineral absorption	Digestive system
			hsa00040 Pentose and glucuronate interconversions	Carbohydrate metabolism
			hsa00561 Glycerolipid metabolism	Lipid metabolism
	Liver-pacifying and wind extinguishing	Liver yang calming	hsa04978 Mineral absorption	Digestive system
			hsa00040 Pentose and glucuronate interconversions	Carbohydrate metabolism
			hsa00561 Glycerolipid metabolism	Lipid metabolism
III	Anti-malarial medicinal	Anti-malarial medicinal	hsa04978 Mineral absorption	Digestive system
			hsa00040 Pentose and glucuronate interconversions	Carbohydrate metabolism
			hsa00561 Glycerolipid metabolism	Lipid metabolism
	Astringent	Secure essence, reduce urination, and check vaginal discharge	hsa04978 Mineral absorption	Digestive system
			hsa00040 Pentose and glucuronate interconversions	Carbohydrate metabolism
			hsa00561 Glycerolipid metabolism	Lipid metabolism
	Dampness resolving	Water draining and anti-icteric	hsa04978 Mineral absorption	Digestive system
			hsa04973 Carbohydrate digestion and absorption	Digestive system
			hsa00040 Pentose and glucuronate interconversions	Carbohydrate metabolism
	Tonifying and replenishing	Yang tonifying	hsa04978 Mineral absorption	Digestive system
			hsa04973 Carbohydrate digestion and absorption	Digestive system
			hsa00040 Pentose and glucuronate interconversions	Carbohydrate metabolism
	Heat clearing medicinal	Heat clearing and detoxicating	hsa04978 Mineral absorption	Digestive system
			hsa04973 Carbohydrate digestion and absorption	Digestive system
			hsa04976 Bile secretion	Digestive system
	Tonifying and replenishing	Yin tonifying	hsa04978 Mineral absorption	Digestive system
			hsa04973 Carbohydrate digestion and absorption	Digestive system
			hsa04976 Bile secretion	Digestive system
	Exterior releasing	Wind heat dispersing	hsa04978 Mineral absorption	Digestive system
			hsa04973 Carbohydrate digestion and absorption	Digestive system
			hsa04976 Bile secretion	Digestive system
	Wind-dampness dispelling	Heat clearing	hsa04978 Mineral absorption	Digestive system
			hsa04973 Carbohydrate digestion and absorption	Digestive system
			hsa04976 Bile secretion	Digestive system
	Heat clearing medicinal	Heat clearing and fire purging	hsa04978 Mineral absorption	Digestive system
			hsa04973 Carbohydrate digestion and absorption	Digestive system
			hsa04976 Bile secretion	Digestive system
	Dampness resolving	Water draining and strangury resolving	hsa04978 Mineral absorption	Digestive system
			hsa04973 Carbohydrate digestion and absorption	Digestive system
			hsa04976 Bile secretion	Digestive system
IV	Heat clearing medicinal	Heat clearing and dampness drying	hsa04978 Mineral absorption	Digestive system
			hsa04973 Carbohydrate digestion and absorption	Digestive system
			hsa04961 Endocrine and other factor-regulated calcium reabsorption	Excretory system
	Blood activating and stress resolving	Blood activating trauma curing	hsa04973 Carbohydrate digestion and absorption	Digestive system
			hsa04976 Bile secretion	Digestive system
			hsa04961 Endocrine and other factor-regulated calcium reabsorption	Excretory system
	Liver-pacifying and wind extinguishing	Extinguish wind to resolve convulsion	hsa04976 Bile secretion	Digestive system
			hsa04961 Endocrine and other factor-regulated calcium reabsorption	Excretory system
			hsa04966 Collecting duct acid secretion	Excretory system
	Blood activating and stress resolving	Blood activating menstruation resolving	hsa04978 Mineral absorption	Digestive system
			hsa04973 Carbohydrate digestion and absorption	Digestive system
			hsa04976 Bile secretion	Digestive system
	Cough suppressing and panting-calming	Cough suppressing and panting calming	hsa04978 Mineral absorption	Digestive system
			hsa04973 Carbohydrate digestion and absorption	Digestive system
			hsa04961 Endocrine and other factor-regulated calcium reabsorption	Excretory system
	Worm expelling medicinal	Worm expelling medicinal	hsa04978 Mineral absorption	Digestive system
			hsa04973 Carbohydrate digestion and absorption	Digestive system
			hsa04976 Bile secretion	Digestive system
V	Astringent	Lung-intestine astringent	hsa04976 Bile secretion	Digestive system
			hsa04961 Endocrine and other factor-regulated calcium reabsorption	Excretory system
			hsa04530 Tight junction	Cellular commiunity
	Digestant medicinal	Digestant medicinal	hsa04976 Bile secretion	Digestive system
			hsa04961 Endocrine and other factor-regulated calcium reabsorption	Excretory system
			hsa00140 Steroid hormone biosynthesis	Lipid metabolism
	Cough suppressing and panting-calming	Cold phlegm resolving and warming	hsa04973 Carbohydrate digestion and absorption	Digestive system
			hsa00100 Steroid biosynthesis	Lipid metabolism
			hsa04520 Adherens junction	Cellular commiunity
VI	Emetic medicinal		hsa03410 Base excision repair	Replication and repair
			hsa00140 Steroid hormone biosynthesis	Lipid metabolism
			hsa04976 Bile secretion	Digestive system
VII	Heat clearing medicinal	Heat clearing and blood cooling	hsa04978 Mineral absorption	Digestive system
			hsa04973 Carbohydrate digestion and absorption	Digestive system
			hsa02010 ABC transporters	Membrane transport
	Hemostatic medicinal	Stasis-resolving hemostatic	hsa04978 Mineral absorption	Digestive system
			hsa04973 Carbohydrate digestion and absorption	Digestive system
			hsa04976 Bile secretion	Digestive system
	Tonifying and replenishing	Blood tonifying	hsa04978 Mineral absorption	Digestive system
			hsa04973 Carbohydrate digestion and absorption	Digestive system
			hsa04530 Tight junction	Cellular commiunity
VIII	Orifice opening	Orifice opening	hsa00140 Steroid hormone biosynthesis	Lipid metabolism
			hsa04976 Bile secretion	Digestive system
			hsa00900 Terpenoid backbone biosynthesis	Metabolism of terpenoids and polyketides
IX	Purgative medicinal	Drastic (purgative) water-expelling	hsa04978 Mineral absorption	Digestive system
			hsa04973 Carbohydrate digestion and absorption	Digestive system
			hsa04530 Tight junction	Cellular commiunity
	Dampness resolving	Water draining and swelling dispersing	hsa00900 Terpenoid backbone biosynthesis	Metabolism of terpenoids and polyketides
			hsa04973 Carbohydrate digestion and absorption	Digestive system
			hsa04530 Tight junction	Cellular commiunity
	Wind-dampness dispelling	Cold dispersing	hsa04530 Tight junction	Cellular commiunity
			hsa05143 African trypanosomiasis	Infectious diseases
			hsa04961 Endocrine and other factor-regulated calcium reabsorption	Excretory system
X	Wind-dampness dispelling	Bone(sinew) strengthening	hsa04978 Mineral absorption	Digestive system
			hsa04973 Carbohydrate digestion and absorption	Digestive system
			hsa04976 Bile secretion	Digestive system
	Tonifying and replenishing	Qi tonifying	hsa04978 Mineral absorption	Digestive system
			hsa04973 Carbohydrate digestion and absorption	Digestive system
			hsa04976 Bile secretion	Digestive system
	Cough suppressing and panting-calming	Clearing and Heat phlegm resolving	hsa04978 Mineral absorption	Digestive system
			hsa04973 Carbohydrate digestion and absorption	Digestive system
			hsa04976 Bile secretion	Digestive system
	Tranqulizing	Heat nourishing tranquilizing	hsa04978 Mineral absorption	Digestive system
			hsa04973 Carbohydrate digestion and absorption	Digestive system
			hsa00900 Terpenoid backbone biosynthesis	Metabolism of terpenoids and polyketides
XI	Astringent	Anhidrotic	hsa04540 Gap junction	Cellular commiunity
			hsa04970 Salivary secretion	Digestive system
			hsa04020 Calcium signaling pathway	Signal transduction
XII	Parasite destroying, dampness eliminating and itchiness relieving		hsa00100 Steroid biosynthesis	Lipid metabolism
			hsa00564 Glycerophospholipid metabolism	Lipid metabolism
			hsa04966 Collecting duct acid secretion	Excretory system
XII	Hemostatic medicinal	Meridian warming hemostatic	hsa00100 Steroid biosynthesis	Lipid metabolism
			hsa04961 Endocrine and other factor-regulated calcium reabsorption	Excretory system
			hsa05143 African trypanosomiasis	Infectious diseases
	Exterior releasing	Wind cold dispersing	hsa00100 Steroid biosynthesis	Lipid metabolism
			hsa00564 Glycerophospholipid metabolism	Lipid metabolism
			hsa00140 Steroid hormone biosynthesis	Lipid metabolism
	Interior warming	Interior warming	hsa04961 Endocrine and other factor-regulated calcium reabsorption	Excretory system
			hsa05143 African trypanosomiasis	Infectious diseases
			hsa05110 Vibrio cholerae infection	Infectious diseases
XIV	Heat clearing medicinal	Deficiency	hsa04978 Mineral absorption	Digestive system
			hsa00040 Pentose and glucuronate interconversions	Carbohydrate metabolism
			hsa00561 Glycerolipid metabolism	Lipid metabolism
	Qi regulating	Qi regulating	hsa00100 Steroid biosynthesis	Lipid metabolism
			hsa00140 Steroid hormone biosynthesis	Lipid metabolism
			hsa04612 Antigen processing and presentation	Immune system
	Blood activating and stress resolving	Blood activating analgesic	hsa00100 Steroid biosynthesis	Lipid metabolism
			hsa04961 Endocrine and other factor-regulated calcium reabsorption	Excretory system
			hsa00140 Steroid hormone biosynthesis	Lipid metabolism
	Hemostatic medicinal	Blood cooling hemostatic	hsa04961 Endocrine and other factor-regulated calcium reabsorption	Excretory system
			hsa00140 Steroid hormone biosynthesis	Lipid metabolism
			hsa04520 Adherens junction	Cellular commiunity
	Blood activating and stress resolving	Blood breaking mass eliminating	hsa04961 Endocrine and other factor-regulated calcium reabsorption	Excretory system
			hsa00140 Steroid hormone biosynthesis	Lipid metabolism
			hsa05143 African trypanosomiasis	Infectious diseases

## Sheet: 3
	Unique targets	Enriched targets
3-hydroxy-3-methylglutaryl-coenzyme A reductase	1	1
3-oxo-5-alpha-steroid 4-dehydrogenase 1	1	1
3-oxo-5-alpha-steroid 4-dehydrogenase 2	1	1
3-phosphoinositide-dependent protein kinase 1	1	0
5-hydroxytryptamine receptor 1A	1	1
5-hydroxytryptamine receptor 1B	1	0
5-hydroxytryptamine receptor 1D	1	0
5-hydroxytryptamine receptor 1F	1	0
5-hydroxytryptamine receptor 2A	1	1
5-hydroxytryptamine receptor 2B	1	1
5-hydroxytryptamine receptor 2C	1	1
5-hydroxytryptamine receptor 3A	1	0
5-hydroxytryptamine receptor 4	1	1
5-hydroxytryptamine receptor 5A	1	1
5-hydroxytryptamine receptor 6	1	1
5-hydroxytryptamine receptor 7	1	1
72 kDa type IV collagenase	1	0
A disintegrin and metalloproteinase with thrombospondin motifs 4	1	1
Acetyl-CoA carboxylase 1	1	0
Acetyl-CoA carboxylase 2	1	0
Acetylcholinesterase	1	1
Acyl-CoA desaturase	1	0
Adenosine kinase	1	0
Adenosine receptor A1	1	0
Adenosine receptor A2a	1	0
Adenosine receptor A2b	1	0
Adenosine receptor A3	1	1
Aldose reductase	1	1
ALK tyrosine kinase receptor	1	0
Alkaline phosphatase, tissue-nonspecific isozyme	1	0
Alpha-1A adrenergic receptor	1	0
Alpha-1B adrenergic receptor	1	1
Alpha-1D adrenergic receptor	1	0
Alpha-2A adrenergic receptor	1	1
Alpha-2B adrenergic receptor	1	1
Alpha-2C adrenergic receptor	1	1
Amine oxidase [flavin-containing] A	1	1
Amine oxidase [flavin-containing] B	1	1
Aminopeptidase N	1	0
Amyloid beta A4 protein	1	1
Androgen receptor	1	1
Angiopoietin-1 receptor	1	0
Angiotensin-converting enzyme	1	1
Arachidonate 15-lipoxygenase	1	1
Arachidonate 5-lipoxygenase	1	1
Aurora kinase B	1	0
Aurora kinase C	1	0
B2 bradykinin receptor	1	0
Baculoviral IAP repeat-containing protein 2	1	0
Beta-1 adrenergic receptor	1	1
Beta-2 adrenergic receptor	1	1
Beta-3 adrenergic receptor	1	1
Beta-secretase 1	1	0
Bile acid receptor	1	1
Bombesin receptor subtype-3	1	1
Bone morphogenetic protein 1	1	0
C-C chemokine receptor type 1	1	0
C-C chemokine receptor type 2	1	0
C-C chemokine receptor type 3	1	0
C-C chemokine receptor type 4	1	0
C-X-C chemokine receptor type 1	1	0
C-X-C chemokine receptor type 2	1	0
C-X-C chemokine receptor type 3	1	0
C-X-C chemokine receptor type 4	1	0
C5a anaphylatoxin chemotactic receptor	1	1
Calcium/calmodulin-dependent protein kinase type II subunit delta	1	0
Calpain-1 catalytic subunit	1	0
Calpain-2 catalytic subunit	1	0
cAMP and cAMP-inhibited cGMP 3',5'-cyclic phosphodiesterase 10A	1	0
cAMP-specific 3',5'-cyclic phosphodiesterase 4A	1	1
cAMP-specific 3',5'-cyclic phosphodiesterase 4B	1	1
cAMP-specific 3',5'-cyclic phosphodiesterase 4C	1	0
cAMP-specific 3',5'-cyclic phosphodiesterase 4D	1	0
Cannabinoid receptor 1	1	1
Cannabinoid receptor 2	1	1
Carbonic anhydrase 1	1	1
Carbonic anhydrase 12	1	1
Carbonic anhydrase 14	1	1
Carbonic anhydrase 2	1	1
Carbonic anhydrase 4	1	1
Carbonic anhydrase 5A, mitochondrial	1	0
Carbonic anhydrase 5B, mitochondrial	1	0
Carbonic anhydrase 6	1	1
Carbonic anhydrase 7	1	0
Carbonic anhydrase 9	1	1
Casein kinase II subunit alpha	1	1
Caspase-1	1	0
Caspase-3	1	0
Caspase-7	1	0
Cathepsin B	1	0
Cathepsin D	1	0
Cathepsin K	1	1
Cathepsin L1	1	0
Cathepsin S	1	0
Cell division cycle 7-related protein kinase	1	0
cGMP-dependent 3',5'-cyclic phosphodiesterase	1	0
cGMP-inhibited 3',5'-cyclic phosphodiesterase A	1	1
cGMP-inhibited 3',5'-cyclic phosphodiesterase B	1	1
cGMP-specific 3',5'-cyclic phosphodiesterase	1	0
Cholecystokinin receptor type A	1	0
Cholinesterase	1	1
Chymase	1	1
Coagulation factor VII	1	0
Coagulation factor X	1	0
Cocaine esterase	1	1
Collagenase 3	1	0
Corticosteroid 11-beta-dehydrogenase isozyme 1	1	1
Corticotropin-releasing factor receptor 1	1	0
Cyclin-dependent kinase 1	1	1
Cyclin-dependent kinase 2	1	1
Cyclin-dependent kinase 4	1	0
Cyclin-dependent kinase 5	1	1
Cysteinyl leukotriene receptor 1	1	0
Cystic fibrosis transmembrane conductance regulator	1	0
Cytochrome P450 11B1, mitochondrial	1	0
Cytochrome P450 11B2, mitochondrial	1	1
Cytochrome P450 19A1	1	1
Cytochrome P450 1A2	1	1
Cytochrome P450 26A1	1	1
Cytochrome P450 2C19	1	1
Cytochrome P450 2C9	1	0
Cytochrome P450 2D6	1	1
Cytochrome P450 3A4	1	1
Cytosolic phospholipase A2	1	1
D(1A) dopamine receptor	1	1
D(1B) dopamine receptor	1	1
D(2) dopamine receptor	1	1
D(3) dopamine receptor	1	1
D(4) dopamine receptor	1	1
Delta-type opioid receptor	1	1
Dihydrofolate reductase	1	1
Dihydroorotate dehydrogenase (quinone), mitochondrial	1	0
Dipeptidyl peptidase 4	1	0
Dipeptidyl peptidase 8	1	0
DNA topoisomerase 1	1	1
DNA-dependent protein kinase catalytic subunit	1	1
Dual specificity mitogen-activated protein kinase kinase 1	1	0
Dual specificity protein kinase CLK1	1	1
Dual specificity protein kinase CLK4	1	1
Dual specificity tyrosine-phosphorylation-regulated kinase 1A	1	1
E3 ubiquitin-protein ligase Mdm2	1	1
E3 ubiquitin-protein ligase XIAP	1	0
Elongation of very long chain fatty acids protein 6	1	0
Endothelin B receptor	1	1
Endothelin-1 receptor	1	1
Endothelin-converting enzyme 1	1	1
Ephrin type-B receptor 4	1	0
Epidermal growth factor receptor	1	1
Epoxide hydrolase 2	1	0
Equilibrative nucleoside transporter 1	1	0
Estradiol 17-beta-dehydrogenase 1	1	1
Estradiol 17-beta-dehydrogenase 2	1	1
Estrogen receptor	1	1
Estrogen receptor beta	1	1
Extracellular calcium-sensing receptor	1	0
Farnesyl pyrophosphate synthase	1	1
Fatty acid-binding protein, adipocyte	1	1
Fatty-acid amide hydrolase 1	1	1
Fibroblast growth factor receptor 1	1	0
Focal adhesion kinase 1	1	1
Free fatty acid receptor 1	1	0
Fructose-1,6-bisphosphatase 1	1	0
G-protein coupled receptor 55	1	1
Gamma-aminobutyric acid receptor subunit alpha-1	1	0
Gamma-aminobutyric acid receptor subunit beta-3	1	0
Gamma-aminobutyric acid receptor subunit gamma-2	1	0
Gamma-secretase subunit APH-1B	1	0
Gastrin/cholecystokinin type B receptor	1	0
Glucagon receptor	1	0
Glucocorticoid receptor	1	1
Glutamate [NMDA] receptor subunit epsilon-2	1	1
Glutamate carboxypeptidase 2	1	1
Glutamate receptor 2	1	0
Glutamate receptor, ionotropic kainate 1	1	0
Glycogen phosphorylase, liver form	1	0
Glycogen synthase kinase-3 alpha	1	0
Glycogen synthase kinase-3 beta	1	0
Gonadotropin-releasing hormone receptor	1	0
Growth hormone secretagogue receptor type 1	1	0
Heat shock protein HSP 90-alpha	1	1
Heat shock protein HSP 90-beta	1	1
Heparanase	1	0
Hepatocyte growth factor receptor	1	0
High affinity nerve growth factor receptor	1	0
Histamine H1 receptor	1	1
Histamine H2 receptor	1	1
Histamine H3 receptor	1	0
Histamine H4 receptor	1	0
Histone deacetylase 1	1	0
Histone deacetylase 2	1	0
Histone deacetylase 3	1	1
Histone deacetylase 4	1	1
Histone deacetylase 6	1	0
Histone deacetylase 8	1	0
Hydroxycarboxylic acid receptor 2	1	0
Ileal sodium/bile acid cotransporter	1	1
Induced myeloid leukemia cell differentiation protein Mcl-1	1	1
Inhibitor of nuclear factor kappa-B kinase subunit alpha	1	0
Inosine-5'-monophosphate dehydrogenase 1	1	0
Inosine-5'-monophosphate dehydrogenase 2	1	1
Insulin receptor	1	1
Integrin alpha-L	1	1
Integrin beta-3	1	0
Interleukin-1 receptor-associated kinase 4	1	0
Interstitial collagenase	1	0
Kappa-type opioid receptor	1	1
Kinesin-like protein KIF11	1	0
KiSS-1 receptor	1	0
Lanosterol synthase	1	1
Leukotriene A-4 hydrolase	1	0
Leukotriene B4 receptor 1	1	1
Liver carboxylesterase 1	1	1
Lysosomal Pro-X carboxypeptidase	1	0
Macrophage colony-stimulating factor 1 receptor	1	0
Macrophage metalloelastase	1	0
Malonyl-CoA decarboxylase, mitochondrial	1	0
MAP kinase-activated protein kinase 2	1	0
Mast/stem cell growth factor receptor Kit	1	0
Matrilysin	1	0
Matrix metalloproteinase-14	1	0
Matrix metalloproteinase-9	1	0
Melanocortin receptor 3	1	0
Melanocortin receptor 4	1	0
Melanocortin receptor 5	1	0
Melanocyte-stimulating hormone receptor	1	0
Melatonin receptor type 1A	1	0
Melatonin receptor type 1B	1	1
Metabotropic glutamate receptor 1	1	1
Metabotropic glutamate receptor 2	1	1
Metabotropic glutamate receptor 4	1	0
Metabotropic glutamate receptor 5	1	0
Methionine aminopeptidase 2	1	0
Mineralocorticoid receptor	1	1
Mitogen-activated protein kinase 1	1	0
Mitogen-activated protein kinase 10	1	0
Mitogen-activated protein kinase 11	1	0
Mitogen-activated protein kinase 14	1	0
Mitogen-activated protein kinase 8	1	0
Mitogen-activated protein kinase 9	1	0
Mitogen-activated protein kinase kinase kinase 8	1	1
Motilin receptor	1	0
Mu-type opioid receptor	1	1
Multidrug resistance protein 1	1	1
Multidrug resistance-associated protein 1	1	1
Muscarinic acetylcholine receptor M1	1	0
Muscarinic acetylcholine receptor M2	1	1
Muscarinic acetylcholine receptor M3	1	1
Muscarinic acetylcholine receptor M4	1	1
Muscarinic acetylcholine receptor M5	1	1
NADPH oxidase 1	1	0
NADPH oxidase 4	1	1
Neprilysin	1	0
Neuromedin-K receptor	1	0
Neuropeptide Y receptor type 1	1	0
Neuropeptide Y receptor type 5	1	0
Neutrophil collagenase	1	0
Neutrophil elastase	1	1
Nischarin	1	1
Nitric oxide synthase, brain	1	0
Nitric oxide synthase, endothelial	1	0
Nitric oxide synthase, inducible	1	0
Nociceptin receptor	1	0
Non-receptor tyrosine-protein kinase TYK2	1	0
Orexin receptor type 1	1	0
Orexin receptor type 2	1	0
Oxysterols receptor LXR-alpha	1	1
Oxysterols receptor LXR-beta	1	0
Oxytocin receptor	1	0
P2X purinoceptor 7	1	0
P2Y purinoceptor 1	1	0
P2Y purinoceptor 12	1	1
P2Y purinoceptor 2	1	0
Peptidyl-prolyl cis-trans isomerase FKBP1A	1	1
Peroxisome proliferator-activated receptor alpha	1	0
Peroxisome proliferator-activated receptor gamma	1	1
Phosphatidylinositol 4,5-bisphosphate 3-kinase catalytic subunit alpha isoform	1	0
Phosphatidylinositol 4,5-bisphosphate 3-kinase catalytic subunit delta isoform	1	0
Phosphatidylinositol 4,5-bisphosphate 3-kinase catalytic subunit gamma isoform	1	0
Phospholipase A2	1	1
Phospholipase A2, membrane associated	1	1
Plasminogen	1	0
Platelet-activating factor acetylhydrolase	1	0
Platelet-activating factor receptor	1	1
Platelet-derived growth factor receptor alpha	1	0
Platelet-derived growth factor receptor beta	1	1
Poly [ADP-ribose] polymerase 1	1	1
Potassium voltage-gated channel subfamily A member 3	1	1
Potassium voltage-gated channel subfamily A member 5	1	0
Potassium voltage-gated channel subfamily H member 2	1	1
Progesterone receptor	1	1
Prolyl endopeptidase	1	0
Prostacyclin receptor	1	0
Prostaglandin D2 receptor	1	0
Prostaglandin D2 receptor 2	1	0
Prostaglandin E synthase	1	0
Prostaglandin E2 receptor EP1 subtype	1	0
Prostaglandin E2 receptor EP2 subtype	1	1
Prostaglandin E2 receptor EP3 subtype	1	0
Prostaglandin E2 receptor EP4 subtype	1	1
Prostaglandin G/H synthase 1	1	1
Prostaglandin G/H synthase 2	1	1
Protein kinase C alpha type	1	1
Protein kinase C beta type	1	1
Protein kinase C delta type	1	1
Protein kinase C epsilon type	1	1
Protein kinase C eta type	1	1
Protein kinase C gamma type	1	1
Protein kinase C theta type	1	0
Protein kinase C zeta type	1	1
Protein-S-isoprenylcysteine O-methyltransferase	1	0
Protein-tyrosine kinase 6	1	0
Proteinase-activated receptor 1	1	1
Prothrombin	1	0
Proto-oncogene tyrosine-protein kinase receptor Ret	1	0
Proto-oncogene tyrosine-protein kinase Src	1	0
Purine nucleoside phosphorylase	1	0
RAC-alpha serine/threonine-protein kinase	1	0
RAC-gamma serine/threonine-protein kinase	1	0
RAF proto-oncogene serine/threonine-protein kinase	1	0
Receptor tyrosine-protein kinase erbB-2	1	0
Receptor-type tyrosine-protein kinase FLT3	1	0
Receptor-type tyrosine-protein phosphatase C	1	1
Renin	1	0
Retinoic acid receptor alpha	1	1
Retinoic acid receptor beta	1	0
Retinoic acid receptor RXR-alpha	1	0
Retinoic acid receptor RXR-gamma	1	0
Rho-associated protein kinase 1	1	0
Rho-associated protein kinase 2	1	1
Ribosomal protein S6 kinase alpha-3	1	0
Ribosomal protein S6 kinase alpha-5	1	0
Ribosomal protein S6 kinase beta-1	1	0
Ribosyldihydronicotinamide dehydrogenase [quinone]	1	1
Serine/threonine-protein kinase Chk1	1	0
Serine/threonine-protein kinase Chk2	1	0
Serine/threonine-protein kinase D1	1	0
Serine/threonine-protein kinase pim-1	1	1
Serine/threonine-protein kinase pim-2	1	0
Serine/threonine-protein kinase pim-3	1	0
Serine/threonine-protein kinase PLK1	1	0
Serine/threonine-protein kinase PLK3	1	0
Serine/threonine-protein kinase RIO1	1	0
Sigma non-opioid intracellular receptor 1	1	1
Signal transducer and activator of transcription 3	1	0
Smoothened homolog	1	0
Sodium channel protein type 9 subunit alpha	1	0
Sodium-dependent dopamine transporter	1	1
Sodium-dependent noradrenaline transporter	1	1
Sodium-dependent serotonin transporter	1	1
Sodium/glucose cotransporter 1	1	1
Sodium/glucose cotransporter 2	1	1
Somatostatin receptor type 2	1	0
Somatostatin receptor type 4	1	0
Somatostatin receptor type 5	1	0
Sphingosine 1-phosphate receptor 1	1	1
Sphingosine 1-phosphate receptor 2	1	1
Sphingosine 1-phosphate receptor 3	1	1
Sphingosine 1-phosphate receptor 4	1	1
Sphingosine 1-phosphate receptor 5	1	1
Squalene synthase	1	1
Steroid 17-alpha-hydroxylase/17,20 lyase	1	1
Steroid hormone receptor ERR1	1	1
Sterol O-acyltransferase 1	1	1
Steryl-sulfatase	1	1
Stromelysin-1	1	0
Substance-K receptor	1	0
Substance-P receptor	1	0
Suppressor of tumorigenicity 14 protein	1	0
Telomerase reverse transcriptase	1	1
Testosterone 17-beta-dehydrogenase 3	1	1
TGF-beta receptor type-1	1	0
Thromboxane A2 receptor	1	1
Thromboxane-A synthase	1	1
Thymidylate synthase	1	0
Thyroid hormone receptor alpha	1	0
Thyroid hormone receptor beta	1	0
Tissue-type plasminogen activator	1	0
Transcription factor AP-1	1	0
Transient receptor potential cation channel subfamily A member 1	1	1
Transient receptor potential cation channel subfamily V member 1	1	1
Trypsin-1	1	0
Tumor necrosis factor	1	1
Type-1 angiotensin II receptor	1	0
Type-2 angiotensin II receptor	1	0
Tyrosine-protein kinase ABL1	1	0
Tyrosine-protein kinase BTK	1	0
Tyrosine-protein kinase Fyn	1	0
Tyrosine-protein kinase HCK	1	0
Tyrosine-protein kinase JAK2	1	0
Tyrosine-protein kinase JAK3	1	1
Tyrosine-protein kinase Lck	1	1
Tyrosine-protein kinase Lyn	1	0
Tyrosine-protein kinase SYK	1	0
Tyrosine-protein kinase Yes	1	0
Tyrosine-protein kinase ZAP-70	1	0
Tyrosine-protein phosphatase non-receptor type 1	1	1
Tyrosine-protein phosphatase non-receptor type 2	1	1
Tyrosine-protein phosphatase non-receptor type 7	1	1
Urokinase-type plasminogen activator	1	0
Urotensin-2 receptor	1	0
Vascular endothelial growth factor receptor 1	1	0
Vascular endothelial growth factor receptor 2	1	0
Vascular endothelial growth factor receptor 3	1	1
Vasopressin V1a receptor	1	0
Vesicular acetylcholine transporter	1	0
Voltage-dependent T-type calcium channel subunit alpha-1G	1	0
Wee1-like protein kinase	1	1
X-box-binding protein 1	1	1
	408	181

## Sheet: 4
	Unique pathways	Enriched pathways
hsa00010 Glycolysis / Gluconeogenesis	1	0
hsa00030 Pentose phosphate pathway	1	0
hsa00040 Pentose and glucuronate interconversions	1	1
hsa00051 Fructose and mannose metabolism	1	0
hsa00052 Galactose metabolism	1	1
hsa00061 Fatty acid biosynthesis	1	0
hsa00100 Steroid biosynthesis	1	1
hsa00140 Steroid hormone biosynthesis	1	1
hsa00230 Purine metabolism	1	1
hsa00232 Caffeine metabolism	1	1
hsa00240 Pyrimidine metabolism	1	0
hsa00260 Glycine, serine and threonine metabolism	1	1
hsa00330 Arginine and proline metabolism	1	1
hsa00340 Histidine metabolism	1	1
hsa00350 Tyrosine metabolism	1	1
hsa00360 Phenylalanine metabolism	1	1
hsa00380 Tryptophan metabolism	1	1
hsa00410 beta-Alanine metabolism	1	0
hsa00480 Glutathione metabolism	1	0
hsa00500 Starch and sucrose metabolism	1	0
hsa00531 Glycosaminoglycan degradation	1	0
hsa00561 Glycerolipid metabolism	1	1
hsa00562 Inositol phosphate metabolism	1	0
hsa00564 Glycerophospholipid metabolism	1	1
hsa00565 Ether lipid metabolism	1	1
hsa00590 Arachidonic acid metabolism	1	1
hsa00591 Linoleic acid metabolism	1	1
hsa00592 alpha-Linolenic acid metabolism	1	1
hsa00620 Pyruvate metabolism	1	1
hsa00640 Propanoate metabolism	1	0
hsa00670 One carbon pool by folate	1	1
hsa00760 Nicotinate and nicotinamide metabolism	1	0
hsa00790 Folate biosynthesis	1	0
hsa00830 Retinol metabolism	1	1
hsa00900 Terpenoid backbone biosynthesis	1	1
hsa00910 Nitrogen metabolism	1	1
hsa00980 Metabolism of xenobiotics by cytochrome P450	1	1
hsa00982 Drug metabolism - cytochrome P450	1	1
hsa00983 Drug metabolism - other enzymes	1	1
hsa01040 Biosynthesis of unsaturated fatty acids	1	0
hsa01100 Metabolic pathways	1	1
hsa02010 ABC transporters	1	1
hsa03008 Ribosome biogenesis in eukaryotes	1	1
hsa03320 PPAR signaling pathway	1	1
hsa03410 Base excision repair	1	1
hsa03450 Non-homologous end-joining	1	1
hsa04010 MAPK signaling pathway	1	1
hsa04012 ErbB signaling pathway	1	1
hsa04020 Calcium signaling pathway	1	1
hsa04060 Cytokine-cytokine receptor interaction	1	1
hsa04062 Chemokine signaling pathway	1	0
hsa04070 Phosphatidylinositol signaling system	1	1
hsa04080 Neuroactive ligand-receptor interaction	1	1
hsa04110 Cell cycle	1	1
hsa04114 Oocyte meiosis	1	1
hsa04115 p53 signaling pathway	1	1
hsa04120 Ubiquitin mediated proteolysis	1	1
hsa04141 Protein processing in endoplasmic reticulum	1	1
hsa04142 Lysosome	1	0
hsa04144 Endocytosis	1	1
hsa04145 Phagosome	1	0
hsa04146 Peroxisome	1	0
hsa04150 mTOR signaling pathway	1	0
hsa04210 Apoptosis	1	0
hsa04270 Vascular smooth muscle contraction	1	1
hsa04310 Wnt signaling pathway	1	1
hsa04320 Dorso-ventral axis formation	1	1
hsa04330 Notch signaling pathway	1	0
hsa04340 Hedgehog signaling pathway	1	0
hsa04350 TGF-beta signaling pathway	1	0
hsa04360 Axon guidance	1	0
hsa04370 VEGF signaling pathway	1	1
hsa04380 Osteoclast differentiation	1	0
hsa04510 Focal adhesion	1	1
hsa04512 ECM-receptor interaction	1	0
hsa04514 Cell adhesion molecules (CAMs)	1	0
hsa04520 Adherens junction	1	1
hsa04530 Tight junction	1	1
hsa04540 Gap junction	1	1
hsa04610 Complement and coagulation cascades	1	1
hsa04612 Antigen processing and presentation	1	1
hsa04614 Renin-angiotensin system	1	0
hsa04620 Toll-like receptor signaling pathway	1	0
hsa04621 NOD-like receptor signaling pathway	1	1
hsa04622 RIG-I-like receptor signaling pathway	1	0
hsa04623 Cytosolic DNA-sensing pathway	1	0
hsa04630 Jak-STAT signaling pathway	1	1
hsa04640 Hematopoietic cell lineage	1	0
hsa04650 Natural killer cell mediated cytotoxicity	1	1
hsa04660 T cell receptor signaling pathway	1	0
hsa04662 B cell receptor signaling pathway	1	0
hsa04664 Fc epsilon RI signaling pathway	1	1
hsa04666 Fc gamma R-mediated phagocytosis	1	1
hsa04670 Leukocyte transendothelial migration	1	1
hsa04672 Intestinal immune network for IgA production	1	0
hsa04720 Long-term potentiation	1	1
hsa04722 Neurotrophin signaling pathway	1	0
hsa04724 Glutamatergic synapse	1	1
hsa04725 Cholinergic synapse	1	1
hsa04730 Long-term depression	1	1
hsa04740 Olfactory transduction	1	0
hsa04742 Taste transduction	1	0
hsa04810 Regulation of actin cytoskeleton	1	1
hsa04910 Insulin signaling pathway	1	0
hsa04912 GnRH signaling pathway	1	1
hsa04914 Progesterone-mediated oocyte maturation	1	1
hsa04916 Melanogenesis	1	1
hsa04920 Adipocytokine signaling pathway	1	0
hsa04930 Type II diabetes mellitus	1	1
hsa04940 Type I diabetes mellitus	1	0
hsa04960 Aldosterone-regulated sodium reabsorption	1	1
hsa04961 Endocrine and other factor-regulated calcium reabsorption	1	1
hsa04964 Proximal tubule bicarbonate reclamation	1	1
hsa04966 Collecting duct acid secretion	1	1
hsa04970 Salivary secretion	1	1
hsa04971 Gastric acid secretion	1	1
hsa04972 Pancreatic secretion	1	1
hsa04973 Carbohydrate digestion and absorption	1	1
hsa04974 Protein digestion and absorption	1	0
hsa04975 Fat digestion and absorption	1	1
hsa04976 Bile secretion	1	1
hsa04977 Vitamin digestion and absorption	1	1
hsa04978 Mineral absorption	1	1
hsa05010 Alzheimer's disease	1	1
hsa05012 Parkinson's disease	1	1
hsa05014 Amyotrophic lateral sclerosis (ALS)	1	0
hsa05016 Huntington's disease	1	0
hsa05020 Prion diseases	1	0
hsa05100 Bacterial invasion of epithelial cells	1	0
hsa05110 Vibrio cholerae infection	1	1
hsa05120 Epithelial cell signaling in Helicobacter pylori infection	1	0
hsa05130 Pathogenic Escherichia coli infection	1	1
hsa05131 Shigellosis	1	0
hsa05133 Pertussis	1	0
hsa05140 Leishmaniasis	1	1
hsa05142 Chagas disease (American trypanosomiasis)	1	0
hsa05143 African trypanosomiasis	1	1
hsa05144 Malaria	1	1
hsa05145 Toxoplasmosis	1	1
hsa05146 Amoebiasis	1	1
hsa05150 Staphylococcus aureus infection	1	0
hsa05152 Tuberculosis	1	0
hsa05160 Hepatitis C	1	0
hsa05162 Measles	1	0
hsa05164 Influenza A	1	1
hsa05200 Pathways in cancer	1	1
hsa05210 Colorectal cancer	1	0
hsa05211 Renal cell carcinoma	1	0
hsa05212 Pancreatic cancer	1	0
hsa05213 Endometrial cancer	1	0
hsa05214 Glioma	1	1
hsa05215 Prostate cancer	1	1
hsa05216 Thyroid cancer	1	0
hsa05217 Basal cell carcinoma	1	0
hsa05218 Melanoma	1	1
hsa05219 Bladder cancer	1	0
hsa05220 Chronic myeloid leukemia	1	0
hsa05221 Acute myeloid leukemia	1	1
hsa05222 Small cell lung cancer	1	0
hsa05223 Non-small cell lung cancer	1	1
hsa05310 Asthma	1	0
hsa05322 Systemic lupus erythematosus	1	1
hsa05323 Rheumatoid arthritis	1	0
hsa05330 Allograft rejection	1	0
hsa05332 Graft-versus-host disease	1	0
hsa05340 Primary immunodeficiency	1	0
hsa05410 Hypertrophic cardiomyopathy (HCM)	1	0
hsa05412 Arrhythmogenic right ventricular cardiomyopathy (ARVC)	1	0
hsa05414 Dilated cardiomyopathy	1	1
hsa05416 Viral myocarditis	1	0
	170	99
